# Supplementary material
Source: PubMed Central journal article supplement (PMC3074252)
Supplement: NIHMS278864-supplement-1_si_001.pdf [file NIHMS278864-supplement-1_si_001.pdf]

# Supporting Information

## Table of contents

|                                                       |         |
|-------------------------------------------------------|---------|
| X-ray analysis of 3 .....                             | S2-S10  |
| X-ray analysis of 43 .....                            | S11-S23 |
| In vitro pharmacokinetic studies of 7 .....           | S24-S25 |
| Radioligand Binding Assays for 7 .....                | S26-S27 |
| G85R-SOD1 high content aggregation assay with 7 ..... | S28     |

## **Pyrimidine-2,4,6-trione Derivatives and Their Inhibition of Mutant SOD1-dependent Protein Aggregation. Toward a Treatment for Amyotrophic Lateral Sclerosis**

*Guoyao Xia,<sup>1</sup> Radhia Benmohamed,<sup>2</sup> Richard I. Morimoto<sup>3</sup>, Robert J. Ferrante<sup>4</sup>, Donald R. Kirsch<sup>2</sup>, and Richard B. Silverman<sup>1,5\*</sup>*

<sup>1</sup>Department of Chemistry, Northwestern University, Evanston, Illinois 60208-3113 USA, <sup>2</sup>Cambria Pharmaceuticals, Cambridge, Massachusetts 02142 USA, <sup>3</sup>Department of Molecular Biosciences, Rice Institute for Biomedical Research, Northwestern University, Evanston, Illinois 60208-3500 USA, <sup>4</sup>Geriatric Research Education and Clinical Center, Bedford Veterans Administration Medical Center, Bedford, Massachusetts 01730, USA and the Department of Neurology, Laboratory Medicine and Pathology, and Psychiatry, Boston University School of Medicine, Boston, Massachusetts 02118 USA, and <sup>5</sup>Department of Molecular Biosciences, Chemistry of Life Processes Institute, Center for Molecular Innovation and Drug Discovery, Northwestern University, Evanston, Illinois 60208-3113 USA.

\* Corresponding author. Tel.: +1 847 491 5663; fax: +1 847 491 7713.

*E-mail address:* [Agman@chem.northwestern.edu](mailto:Agman@chem.northwestern.edu)

### **1. X-ray analysis of 3** **Data Collection**

A colorless block crystal of C<sub>10</sub> H<sub>16</sub> N<sub>2</sub> O<sub>3</sub> having approximate dimensions of 0.59 x 0.44 x 0.20 mm was mounted using oil (Infineum V8512) on a glass fiber. All measurements were made on a CCD area detector with graphite monochromated CuK $\alpha$  radiation.

Cell constants and an orientation matrix for data collection corresponded to a monoclinic cell with dimensions:

$$\begin{aligned} a &= 10.6592(2) \text{ \AA} \\ b &= 15.3170(3) \text{ \AA} \quad \beta = 108.1620(10)^\circ \\ c &= 6.90890(10) \text{ \AA} \\ V &= 1071.80(3) \text{ \AA}^3 \end{aligned}$$

For  $Z = 4$  and  $F.W. = 212.25$ , the calculated density is 1.315 g/cm<sup>3</sup>. Based on a systematic absence, and the successful solution and refinement of the structure, the space group was determined to be:

$$P2(1)/c$$

The data were collected at a temperature of 100(2)K with a theta range for data collection of 5.78 to 67.00°. Data were collected in 0.5° oscillations with 5 second exposures. The crystal-to-detector distance was 40.00 mm.

## Data Reduction

Of the 12853 reflections which were collected, 1867 were unique ( $R_{int} = 0.0435$ ). Data were collected using APEX2 V2.1-4 (Bruker, 2007) detector and processed using SAINTPLUS from Bruker.

The linear absorption coefficient,  $\mu$ , for CuK $\alpha$  radiation is  $0.809 \text{ mm}^{-1}$ . A numerical absorption correction was applied. Minimum and maximum transmission factors were: 0.6447 and 0.8562, respectively. The data were corrected for Lorentz and polarization effects.

## Structure Solution and Refinement

The structure was solved by direct methods and expanded using Fourier techniques<sup>3</sup>. The non-hydrogen atoms were refined anisotropically.

Hydrogen atoms were included in idealized positions, but not refined. The final cycle of full-matrix least-squares refinement<sup>4</sup> on  $F^2$  was based on 1867 reflections and 138 variable parameters and converged (largest parameter shift was 0.001 times its esd) with unweighted and weighted agreement factors of:

$$R1 = \Sigma |F_o| - |F_c| / \Sigma |F_o| = 0.0396$$

$$wR^2 = \{ \Sigma [w(F_o^2 - F_c^2)^2] / \Sigma [w(F_o^2)^2] \}^{1/2} = 0.1259$$

The weighting scheme was calc.

$$\text{calc } w = 1 / [\sigma^2(F_o^2) + (0.0760P)^2 + 0.3382P] \text{ where } P = (F_o^2 + 2F_c^2) / 3$$

The standard deviation of an observation of unit weight<sup>5</sup> was 1.259. The weighting scheme was based on counting statistics and included a factor to downweight the intense reflections. Plots of  $\Sigma w (|F_o| - |F_c|)^2$  versus  $|F_o|$ , reflection order in data collection,  $\sin \theta / \lambda$  and various classes of indices showed no unusual trends. The maximum and minimum peaks on the final difference Fourier map corresponded to 0.481 and  $-0.541 \text{ e}^-/\text{\AA}^3$ , respectively.

Neutral atom scattering factors were taken from Cromer and Waber<sup>1</sup>. Anomalous dispersion effects were included in  $F_{calc}^2$ ; the values for  $D_f'$  and  $D_f''$  were those of Creagh and McAuley<sup>3</sup>. The values for the mass attenuation coefficients are those of Creagh and Hubbell<sup>4</sup>. All calculations were performed using the Bruker SHELXTL3 crystallographic software package.

**Table 1.** Crystal data and structure refinement for **3**.

|                     |               |
|---------------------|---------------|
| Identification code | s27z          |
| Empirical formula   | C10 H16 N2 O3 |
| Formula weight      | 212.25        |

|                                   |                                                                                 |
|-----------------------------------|---------------------------------------------------------------------------------|
| Temperature                       | 100(2) K                                                                        |
| Wavelength                        | 1.54178 Å                                                                       |
| Crystal system, space group       | Monoclinic, P2(1)/c                                                             |
| Unit cell dimensions              | a = 10.6592(2) Å<br>b = 15.3170(3) Å    β = 108.1620(10) °<br>c = 6.90890(10) Å |
| Volume                            | 1071.80(3) Å <sup>3</sup>                                                       |
| Z, Calculated density             | 4, 1.315 Mg/m <sup>3</sup>                                                      |
| Absorption coefficient            | 0.809 mm <sup>-1</sup>                                                          |
| F(000)                            | 456                                                                             |
| Crystal size                      | 0.59 x 0.44 x 0.20 mm                                                           |
| Theta range for data collection   | 5.78 to 67.00 °                                                                 |
| Limiting indices                  | -12 ≤ h ≤ 12, -17 ≤ k ≤ 8, -8 ≤ l ≤ 8                                           |
| Reflections collected / unique    | 12853 / 1867 [R(int) = 0.0435]                                                  |
| Completeness to theta = 67.00     | 97.3 %                                                                          |
| Absorption correction             | Numerical                                                                       |
| Max. and min. transmission        | 0.8562 and 0.6447                                                               |
| Refinement method                 | Full-matrix least-squares on F <sup>2</sup>                                     |
| Data / restraints / parameters    | 1867 / 0 / 138                                                                  |
| Goodness-of-fit on F <sup>2</sup> | 1.259                                                                           |
| Final R indices [I > 2σ(I)]       | R1 = 0.0396, wR2 = 0.1259                                                       |
| R indices (all data)              | R1 = 0.0462, wR2 = 0.1390                                                       |
| Largest diff. peak and hole       | 0.481 and -0.541 e <sup>-</sup> /Å <sup>-3</sup>                                |

**Table 2.** Atomic coordinates and equivalent isotropic displacement parameters ( $\text{\AA}^2 \times 10^3$ ) for **3**.

U(eq) is defined as one third of the trace of the orthogonalized Uij tensor.

---

|       | x           | y           | z           | U(eq) |
|-------|-------------|-------------|-------------|-------|
| O(1)  | 0.89610(11) | 0.60389(8)  | 0.24442(17) | 25(1) |
| O(2)  | 0.43109(11) | 0.60383(7)  | 0.00561(16) | 25(1) |
| O(3)  | 0.65552(10) | 0.69371(7)  | 0.64497(15) | 24(1) |
| N(1)  | 0.77756(12) | 0.64772(8)  | 0.44782(18) | 17(1) |
| N(2)  | 0.54154(12) | 0.64570(8)  | 0.32815(19) | 18(1) |
| C(1)  | 0.78916(15) | 0.61538(9)  | 0.2664(2)   | 18(1) |
| C(2)  | 0.66425(15) | 0.59429(10) | 0.1016(2)   | 20(1) |
| C(3)  | 0.53589(15) | 0.61494(9)  | 0.1375(2)   | 18(1) |
| C(4)  | 0.65831(14) | 0.66405(9)  | 0.4826(2)   | 18(1) |
| C(5)  | 0.90023(14) | 0.66882(10) | 0.6132(2)   | 20(1) |
| C(6)  | 0.94837(15) | 0.59346(10) | 0.7594(2)   | 22(1) |
| C(7)  | 1.07411(15) | 0.61758(11) | 0.9279(2)   | 24(1) |
| C(8)  | 0.41616(14) | 0.66490(10) | 0.3681(2)   | 20(1) |
| C(9)  | 0.36691(14) | 0.58879(10) | 0.4651(2)   | 21(1) |
| C(10) | 0.24161(15) | 0.61390(11) | 0.5139(2)   | 23(1) |

---

**Table 3.** Bond lengths [Å] and angles [deg] for **3**.

---

|                 |            |
|-----------------|------------|
| O(1)-C(1)       | 1.2089(19) |
| O(2)-C(3)       | 1.2136(19) |
| O(3)-C(4)       | 1.2189(19) |
| N(1)-C(4)       | 1.3881(19) |
| N(1)-C(1)       | 1.3884(19) |
| N(1)-C(5)       | 1.4794(17) |
| N(2)-C(3)       | 1.382(2)   |
| N(2)-C(4)       | 1.3926(19) |
| N(2)-C(8)       | 1.4760(18) |
| C(1)-C(2)       | 1.493(2)   |
| C(2)-C(3)       | 1.498(2)   |
| C(2)-H(2A)      | 0.9900     |
| C(2)-H(2B)      | 0.9900     |
| C(5)-C(6)       | 1.514(2)   |
| C(5)-H(5A)      | 0.9900     |
| C(5)-H(5B)      | 0.9900     |
| C(6)-C(7)       | 1.521(2)   |
| C(6)-H(6A)      | 0.9900     |
| C(6)-H(6B)      | 0.9900     |
| C(7)-H(7A)      | 0.9800     |
| C(7)-H(7B)      | 0.9800     |
| C(7)-H(7C)      | 0.9800     |
| C(8)-C(9)       | 1.517(2)   |
| C(8)-H(8A)      | 0.9900     |
| C(8)-H(8B)      | 0.9900     |
| C(9)-C(10)      | 1.525(2)   |
| C(9)-H(9A)      | 0.9900     |
| C(9)-H(9B)      | 0.9900     |
| C(10)-H(10A)    | 0.9800     |
| C(10)-H(10B)    | 0.9800     |
| C(10)-H(10C)    | 0.9800     |
| C(4)-N(1)-C(1)  | 124.38(12) |
| C(4)-N(1)-C(5)  | 117.60(12) |
| C(1)-N(1)-C(5)  | 117.99(12) |
| C(3)-N(2)-C(4)  | 124.20(12) |
| C(3)-N(2)-C(8)  | 118.23(12) |
| C(4)-N(2)-C(8)  | 117.48(12) |
| O(1)-C(1)-N(1)  | 121.21(13) |
| O(1)-C(1)-C(2)  | 121.62(13) |
| N(1)-C(1)-C(2)  | 117.17(13) |
| C(1)-C(2)-C(3)  | 118.12(13) |
| C(1)-C(2)-H(2A) | 107.8      |
| C(3)-C(2)-H(2A) | 107.8      |
| C(1)-C(2)-H(2B) | 107.8      |

|                     |            |
|---------------------|------------|
| C(3)-C(2)-H(2B)     | 107.8      |
| H(2A)-C(2)-H(2B)    | 107.1      |
| O(2)-C(3)-N(2)      | 121.32(14) |
| O(2)-C(3)-C(2)      | 121.36(13) |
| N(2)-C(3)-C(2)      | 117.32(13) |
| O(3)-C(4)-N(1)      | 120.86(13) |
| O(3)-C(4)-N(2)      | 120.54(13) |
| N(1)-C(4)-N(2)      | 118.60(12) |
| N(1)-C(5)-C(6)      | 112.51(12) |
| N(1)-C(5)-H(5A)     | 109.1      |
| C(6)-C(5)-H(5A)     | 109.1      |
| N(1)-C(5)-H(5B)     | 109.1      |
| C(6)-C(5)-H(5B)     | 109.1      |
| H(5A)-C(5)-H(5B)    | 107.8      |
| C(5)-C(6)-C(7)      | 111.08(13) |
| C(5)-C(6)-H(6A)     | 109.4      |
| C(7)-C(6)-H(6A)     | 109.4      |
| C(5)-C(6)-H(6B)     | 109.4      |
| C(7)-C(6)-H(6B)     | 109.4      |
| H(6A)-C(6)-H(6B)    | 108.0      |
| C(6)-C(7)-H(7A)     | 109.5      |
| C(6)-C(7)-H(7B)     | 109.5      |
| H(7A)-C(7)-H(7B)    | 109.5      |
| C(6)-C(7)-H(7C)     | 109.5      |
| H(7A)-C(7)-H(7C)    | 109.5      |
| H(7B)-C(7)-H(7C)    | 109.5      |
| N(2)-C(8)-C(9)      | 112.80(12) |
| N(2)-C(8)-H(8A)     | 109.0      |
| C(9)-C(8)-H(8A)     | 109.0      |
| N(2)-C(8)-H(8B)     | 109.0      |
| C(9)-C(8)-H(8B)     | 109.0      |
| H(8A)-C(8)-H(8B)    | 107.8      |
| C(8)-C(9)-C(10)     | 110.56(13) |
| C(8)-C(9)-H(9A)     | 109.5      |
| C(10)-C(9)-H(9A)    | 109.5      |
| C(8)-C(9)-H(9B)     | 109.5      |
| C(10)-C(9)-H(9B)    | 109.5      |
| H(9A)-C(9)-H(9B)    | 108.1      |
| C(9)-C(10)-H(10A)   | 109.5      |
| C(9)-C(10)-H(10B)   | 109.5      |
| H(10A)-C(10)-H(10B) | 109.5      |
| C(9)-C(10)-H(10C)   | 109.5      |
| H(10A)-C(10)-H(10C) | 109.5      |
| H(10B)-C(10)-H(10C) | 109.5      |

---

Symmetry transformations used to generate equivalent atoms:

**Table 4.** Anisotropic displacement parameters ( $\text{Å}^2 \times 10^3$ ) for **3**.

The anisotropic displacement factor exponent takes the form:

$$-2 \pi^2 [ h^2 a^{*2} U_{11} + \dots + 2 h k a^* b^* U_{12} ]$$

---

|       | U11   | U22   | U33   | U23   | U13   | U12   |
|-------|-------|-------|-------|-------|-------|-------|
| O(1)  | 18(1) | 35(1) | 26(1) | 0(1)  | 9(1)  | 1(1)  |
| O(2)  | 18(1) | 30(1) | 21(1) | -2(1) | -1(1) | -1(1) |
| O(3)  | 26(1) | 29(1) | 17(1) | -6(1) | 7(1)  | 2(1)  |
| N(1)  | 14(1) | 19(1) | 16(1) | 0(1)  | 2(1)  | -1(1) |
| N(2)  | 14(1) | 20(1) | 18(1) | 1(1)  | 5(1)  | 1(1)  |
| C(1)  | 19(1) | 16(1) | 18(1) | 3(1)  | 6(1)  | 0(1)  |
| C(2)  | 20(1) | 23(1) | 16(1) | -2(1) | 5(1)  | 0(1)  |
| C(3)  | 19(1) | 16(1) | 17(1) | 2(1)  | 3(1)  | -1(1) |
| C(4)  | 18(1) | 17(1) | 17(1) | 2(1)  | 4(1)  | 1(1)  |
| C(5)  | 15(1) | 22(1) | 18(1) | -1(1) | 1(1)  | -2(1) |
| C(6)  | 19(1) | 25(1) | 19(1) | 2(1)  | 3(1)  | 1(1)  |
| C(7)  | 19(1) | 33(1) | 18(1) | 1(1)  | 3(1)  | 2(1)  |
| C(8)  | 15(1) | 24(1) | 22(1) | 1(1)  | 6(1)  | 2(1)  |
| C(9)  | 18(1) | 24(1) | 21(1) | 1(1)  | 7(1)  | 1(1)  |
| C(10) | 18(1) | 32(1) | 20(1) | -2(1) | 7(1)  | -1(1) |

---



**Table 5.** Hydrogen coordinates (  $\times 10^4$ ) and isotropic displacement parameters ( $\text{Å}^2 \times 10^3$ ) for **3**.

---

|        | x     | y    | z     | U(eq) |
|--------|-------|------|-------|-------|
| H(2A)  | 6650  | 5310 | 725   | 24    |
| H(2B)  | 6658  | 6256 | -229  | 24    |
| H(5A)  | 8842  | 7200 | 6897  | 24    |
| H(5B)  | 9699  | 6848 | 5528  | 24    |
| H(6A)  | 9655  | 5422 | 6839  | 26    |
| H(6B)  | 8790  | 5772 | 8203  | 26    |
| H(7A)  | 11427 | 6340 | 8676  | 35    |
| H(7B)  | 11042 | 5674 | 10185 | 35    |
| H(7C)  | 10564 | 6669 | 10060 | 35    |
| H(8A)  | 3482  | 6801 | 2381  | 24    |
| H(8B)  | 4288  | 7162 | 4593  | 24    |
| H(9A)  | 4360  | 5713 | 5919  | 25    |
| H(9B)  | 3485  | 5383 | 3708  | 25    |
| H(10A) | 2608  | 6623 | 6116  | 35    |
| H(10B) | 2099  | 5636 | 5728  | 35    |
| H(10C) | 1736  | 6320 | 3885  | 35    |

---

**Table 6.** Torsion angles [deg] for **3**.

---

|                      |             |
|----------------------|-------------|
| C(4)-N(1)-C(1)-O(1)  | 178.76(13)  |
| C(5)-N(1)-C(1)-O(1)  | 0.7(2)      |
| C(4)-N(1)-C(1)-C(2)  | -2.1(2)     |
| C(5)-N(1)-C(1)-C(2)  | 179.85(12)  |
| O(1)-C(1)-C(2)-C(3)  | -176.83(13) |
| N(1)-C(1)-C(2)-C(3)  | 4.1(2)      |
| C(4)-N(2)-C(3)-O(2)  | -176.60(13) |
| C(8)-N(2)-C(3)-O(2)  | 0.0(2)      |
| C(4)-N(2)-C(3)-C(2)  | 4.5(2)      |
| C(8)-N(2)-C(3)-C(2)  | -178.87(12) |
| C(1)-C(2)-C(3)-O(2)  | 175.93(13)  |
| C(1)-C(2)-C(3)-N(2)  | -5.2(2)     |
| C(1)-N(1)-C(4)-O(3)  | -178.92(13) |
| C(5)-N(1)-C(4)-O(3)  | -0.9(2)     |
| C(1)-N(1)-C(4)-N(2)  | 1.2(2)      |
| C(5)-N(1)-C(4)-N(2)  | 179.22(12)  |
| C(3)-N(2)-C(4)-O(3)  | 177.63(13)  |
| C(8)-N(2)-C(4)-O(3)  | 1.0(2)      |
| C(3)-N(2)-C(4)-N(1)  | -2.5(2)     |
| C(8)-N(2)-C(4)-N(1)  | -179.12(12) |
| C(4)-N(1)-C(5)-C(6)  | 88.79(16)   |
| C(1)-N(1)-C(5)-C(6)  | -93.06(15)  |
| N(1)-C(5)-C(6)-C(7)  | -179.72(12) |
| C(3)-N(2)-C(8)-C(9)  | 94.04(16)   |
| C(4)-N(2)-C(8)-C(9)  | -89.12(16)  |
| N(2)-C(8)-C(9)-C(10) | 176.81(12)  |

---

## 2. X-ray analysis of 43

### Data Collection

A yellow plate crystal of  $C_{25}H_{36}N_2O_5$  having approximate dimensions of 0.29 x 0.25 x 0.08 mm was mounted using oil (Infinitec V8512) on a glass fiber. All measurements were made on a CCD area detector with graphite monochromated  $CuK\alpha$  radiation.

Cell constants and an orientation matrix for data collection corresponded to a monoclinic cell with dimensions:

$$\begin{aligned} a &= 6.15270(10) \text{ \AA} \\ b &= 37.1816(9) \text{ \AA} \quad \beta = 101.1810(10)^\circ \\ c &= 10.0416(2) \text{ \AA} \\ V &= 2253.59(8) \text{ \AA}^3 \end{aligned}$$

For  $Z = 4$  and F.W. = 444.56, the calculated density is 1.310 g/cm<sup>3</sup>. Based on a statistical analysis of intensity distribution, and the successful solution and refinement of the structure, the space group was determined to be:

Cc

The data were collected at a temperature of 100(2)K with a theta range for data collection of 5.08 to 66.69°. Data were collected in 0.5° oscillations with 10 second exposures. The crystal-to-detector distance was 40.00 mm.

### Data Reduction

Of the 8493 reflections which were collected, 2189 were unique ( $R_{int} = 0.0604$ ). Data were collected using APEX2 V2.1-4 (Bruker, 2007) detector and processed using SAINTPLUS from Bruker.

The linear absorption coefficient,  $\mu$ , for  $CuK\alpha$  radiation is 0.734 mm<sup>-1</sup>. A numerical absorption correction was applied. Minimum and maximum transmission factors were: 0.8153 and 0.9436, respectively. The data were corrected for Lorentz and polarization effects.

### Structure Solution and Refinement

The structure was solved by direct methods and expanded using Fourier techniques<sup>3</sup>. Group anisotropic displacement parameters were refined for the disordered carbon atoms C6a-C7b. It refined to a 57% disorder. The remaining non-hydrogen atoms were refined anisotropically. Hydrogen atoms were included but not refined. The final cycle of full-matrix least-squares refinement<sup>4</sup> on F<sup>2</sup> was based on 2189 reflections and 292 variable parameters and converged (largest parameter shift was 0.000 times its esd) with unweighted and weighted agreement factors of:

$$R1 = \Sigma |F_o| - |F_c| / \Sigma |F_o| = 0.0708$$

$$wR^2 = \{ \Sigma [w(F_o^2 - F_c^2)^2] / \Sigma [w(F_o^2)^2] \}^{1/2} = 0.2018$$

The weighting scheme was calc.

$$\text{calc } w = 1 / [\sigma^2(F_o^2) + (0.1846P)^2 + 0.3393P] \text{ where } P = (F_o^2 + 2F_c^2) / 3$$

The standard deviation of an observation of unit weight<sup>5</sup> was 1.109.

The weighting scheme was based on counting statistics and included a factor to downweight the intense reflections. Plots of  $\Sigma w (|F_o| - |F_c|)^2$  versus  $|F_o|$ , reflection order in data collection,  $\sin \theta / \lambda$  and various classes of indices showed no unusual trends. The maximum and minimum peaks on the final difference Fourier map corresponded to 0.606 and -0.596 e-/Å<sup>3</sup>, respectively.

Neutral atom scattering factors were taken from Cromer and Waber<sup>1</sup>. Anomalous dispersion effects were included in Fcalc<sup>2</sup>; the values for Df' and Df'' were those of Creagh and McAuley<sup>3</sup>. The values for the mass attenuation coefficients are those of Creagh and Hubbell<sup>4</sup>. All calculations were performed using the Bruker SHELXTL3 crystallographic software package.

**Table 7.** Crystal structure data and structure refinement for **43**.

|                                   |                                                                              |
|-----------------------------------|------------------------------------------------------------------------------|
| Identification code               | s28z                                                                         |
| Empirical formula                 | C <sub>25</sub> H <sub>36</sub> N <sub>2</sub> O <sub>5</sub>                |
| Formula weight                    | 444.56                                                                       |
| Temperature                       | 100(2) K                                                                     |
| Wavelength                        | 1.54178 Å                                                                    |
| Crystal system, space group       | Monoclinic, Cc                                                               |
| Unit cell dimensions              | a = 6.15270(10) Å<br>b = 37.1816(9) Å β = 101.1810(10) °<br>c = 10.0416(2) Å |
| Volume                            | 2253.59(8) Å <sup>3</sup>                                                    |
| Z, Calculated density             | 4, 1.310 Mg/m <sup>3</sup>                                                   |
| Absorption coefficient            | 0.734 mm <sup>-1</sup>                                                       |
| F(000)                            | 960                                                                          |
| Crystal size                      | 0.29 x 0.25 x 0.08 mm                                                        |
| Theta range for data collection   | 5.08 to 66.69 °                                                              |
| Limiting indices                  | -1 ≤ h ≤ 7, -43 ≤ k ≤ 39, -11 ≤ l ≤ 11                                       |
| Reflections collected / unique    | 8493 / 2189 [R(int) = 0.0604]                                                |
| Completeness to theta = 66.69     | 96.6 %                                                                       |
| Absorption correction             | Numerical                                                                    |
| Max. and min. transmission        | 0.9436 and 0.8153                                                            |
| Refinement method                 | Full-matrix least-squares on F <sup>2</sup>                                  |
| Data / restraints / parameters    | 2189 / 2 / 292                                                               |
| Goodness-of-fit on F <sup>2</sup> | 1.109                                                                        |
| Final R indices [I > 2σ(I)]       | R1 = 0.0708, wR2 = 0.2018                                                    |
| R indices (all data)              | R1 = 0.0816, wR2 = 0.2232                                                    |
| Absolute structure parameter      | 0.2(5)                                                                       |
| Largest diff. peak and hole       | 0.606 and -0.596 e-/Å <sup>-3</sup>                                          |

**Table 8.** Atomic coordinates and equivalent isotropic displacement parameters ( $\text{\AA}^2 \times 10^3$ ) for 43.

U(eq) is defined as one third of the trace of the orthogonalized  $U_{ij}$  tensor.

|       | x          | y           | z          | U(eq) |
|-------|------------|-------------|------------|-------|
| O(1)  | 0.8781(10) | 0.32762(13) | 0.5083(6)  | 74(2) |
| O(2)  | 0.2463(7)  | 0.36989(11) | 0.2519(5)  | 47(1) |
| O(3)  | 0.7613(6)  | 0.45177(10) | 0.4337(4)  | 34(1) |
| O(4)  | 1.4379(6)  | 0.42809(10) | 0.6603(3)  | 33(1) |
| O(5)  | 1.6205(7)  | 0.33840(12) | 1.0141(4)  | 44(1) |
| N(1)  | 0.5491(8)  | 0.34851(14) | 0.3942(5)  | 40(1) |
| N(2)  | 0.5194(7)  | 0.41006(12) | 0.3276(4)  | 30(1) |
| C(1)  | 0.8382(8)  | 0.39054(15) | 0.4974(5)  | 33(1) |
| C(2)  | 0.7640(10) | 0.35374(16) | 0.4714(5)  | 40(1) |
| C(3)  | 0.4274(9)  | 0.37570(17) | 0.3204(5)  | 36(1) |
| C(4)  | 0.7125(8)  | 0.42041(14) | 0.4203(5)  | 29(1) |
| C(5)  | 0.4470(12) | 0.3125(2)   | 0.3856(8)  | 58(2) |
| C(6A) | 0.438(3)   | 0.2978(3)   | 0.5302(14) | 57(2) |
| C(7A) | 0.250(3)   | 0.2613(3)   | 0.4614(17) | 57(2) |
| C(6B) | 0.321(4)   | 0.2993(4)   | 0.4520(19) | 57(2) |
| C(7B) | 0.317(4)   | 0.2637(5)   | 0.529(2)   | 57(2) |
| C(8)  | 0.395(2)   | 0.2358(3)   | 0.4173(15) | 99(4) |
| C(9)  | 0.4108(18) | 0.2521(2)   | 0.2722(11) | 76(2) |
| C(10) | 0.529(2)   | 0.2884(2)   | 0.2904(10) | 85(3) |
| C(11) | 0.3984(8)  | 0.43934(14) | 0.2415(5)  | 29(1) |
| C(12) | 0.1816(8)  | 0.44929(15) | 0.2837(5)  | 33(1) |
| C(13) | 0.0692(9)  | 0.47963(16) | 0.1954(5)  | 38(1) |
| C(14) | 0.0347(9)  | 0.47026(16) | 0.0446(5)  | 38(1) |
| C(15) | 0.2536(11) | 0.46154(17) | 0.0045(5)  | 42(1) |
| C(16) | 0.3736(10) | 0.43055(16) | 0.0913(5)  | 37(1) |
| C(17) | 1.0302(8)  | 0.40105(15) | 0.5827(5)  | 32(1) |
| C(18) | 1.1851(8)  | 0.38247(14) | 0.6849(5)  | 31(1) |
| C(19) | 1.3950(8)  | 0.39842(14) | 0.7291(5)  | 31(1) |
| C(20) | 1.5472(8)  | 0.38393(15) | 0.8373(5)  | 32(1) |
| C(21) | 1.4915(9)  | 0.35410(16) | 0.9051(5)  | 35(1) |
| C(22) | 1.2811(9)  | 0.33800(15) | 0.8630(6)  | 38(1) |
| C(23) | 1.1364(9)  | 0.35213(16) | 0.7581(6)  | 38(1) |
| C(24) | 1.6171(9)  | 0.45124(15) | 0.7213(5)  | 36(1) |
| C(25) | 1.8313(10) | 0.35461(16) | 1.0701(6)  | 42(1) |

**Table 9.** Bond lengths [Å] and angles [deg] for **43**.

---

|              |           |
|--------------|-----------|
| O(1)-C(2)    | 1.213(8)  |
| O(2)-C(3)    | 1.210(6)  |
| O(3)-C(4)    | 1.205(7)  |
| O(4)-C(19)   | 1.355(7)  |
| O(4)-C(24)   | 1.439(6)  |
| O(5)-C(21)   | 1.354(7)  |
| O(5)-C(25)   | 1.442(7)  |
| N(1)-C(3)    | 1.385(7)  |
| N(1)-C(2)    | 1.410(7)  |
| N(1)-C(5)    | 1.473(8)  |
| N(2)-C(3)    | 1.393(7)  |
| N(2)-C(4)    | 1.414(6)  |
| N(2)-C(11)   | 1.496(6)  |
| C(1)-C(17)   | 1.374(7)  |
| C(1)-C(2)    | 1.450(8)  |
| C(1)-C(4)    | 1.483(7)  |
| C(5)-C(6B)   | 1.220(17) |
| C(5)-C(10)   | 1.468(12) |
| C(5)-C(6A)   | 1.564(14) |
| C(5)-H(5)    | 1.0000    |
| C(6A)-C(7A)  | 1.83(2)   |
| C(6A)-H(6A)  | 0.9900    |
| C(6A)-H(6B)  | 0.9900    |
| C(7A)-C(8)   | 1.432(18) |
| C(7A)-H(7A)  | 0.9900    |
| C(7A)-H(7B)  | 0.9900    |
| C(6B)-C(7B)  | 1.53(2)   |
| C(6B)-H(6C)  | 0.9900    |
| C(6B)-H(6D)  | 0.9900    |
| C(7B)-C(8)   | 1.66(2)   |
| C(7B)-H(7C)  | 0.9900    |
| C(7B)-H(7D)  | 0.9900    |
| C(8)-C(9)    | 1.597(16) |
| C(8)-H(8A)   | 0.9900    |
| C(8)-H(8B)   | 0.9900    |
| C(9)-C(10)   | 1.529(10) |
| C(9)-H(9A)   | 0.9900    |
| C(9)-H(9B)   | 0.9900    |
| C(10)-H(10A) | 0.9900    |
| C(10)-H(10B) | 0.9900    |
| C(11)-C(16)  | 1.521(7)  |
| C(11)-C(12)  | 1.522(7)  |
| C(11)-H(11)  | 1.0000    |

|                  |          |
|------------------|----------|
| C(12)-C(13)      | 1.516(7) |
| C(12)-H(12A)     | 0.9900   |
| C(12)-H(12B)     | 0.9900   |
| C(13)-C(14)      | 1.528(7) |
| C(13)-H(13A)     | 0.9900   |
| C(13)-H(13B)     | 0.9900   |
| C(14)-C(15)      | 1.513(8) |
| C(14)-H(14A)     | 0.9900   |
| C(14)-H(14B)     | 0.9900   |
| C(15)-C(16)      | 1.544(8) |
| C(15)-H(15A)     | 0.9900   |
| C(15)-H(15B)     | 0.9900   |
| C(16)-H(16A)     | 0.9900   |
| C(16)-H(16B)     | 0.9900   |
| C(17)-C(18)      | 1.436(7) |
| C(17)-H(17)      | 0.9500   |
| C(18)-C(23)      | 1.410(8) |
| C(18)-C(19)      | 1.412(7) |
| C(19)-C(20)      | 1.398(7) |
| C(20)-C(21)      | 1.379(8) |
| C(20)-H(20)      | 0.9500   |
| C(21)-C(22)      | 1.415(8) |
| C(22)-C(23)      | 1.347(9) |
| C(22)-H(22)      | 0.9500   |
| C(23)-H(23)      | 0.9500   |
| C(24)-H(24A)     | 0.9800   |
| C(24)-H(24B)     | 0.9800   |
| C(24)-H(24C)     | 0.9800   |
| C(25)-H(25A)     | 0.9800   |
| C(25)-H(25B)     | 0.9800   |
| C(25)-H(25C)     | 0.9800   |
|                  |          |
| C(19)-O(4)-C(24) | 118.6(4) |
| C(21)-O(5)-C(25) | 118.5(5) |
| C(3)-N(1)-C(2)   | 123.1(5) |
| C(3)-N(1)-C(5)   | 116.8(5) |
| C(2)-N(1)-C(5)   | 120.1(5) |
| C(3)-N(2)-C(4)   | 124.4(4) |
| C(3)-N(2)-C(11)  | 119.1(4) |
| C(4)-N(2)-C(11)  | 116.3(4) |
| C(17)-C(1)-C(2)  | 125.7(5) |
| C(17)-C(1)-C(4)  | 114.2(5) |
| C(2)-C(1)-C(4)   | 119.9(4) |
| O(1)-C(2)-N(1)   | 118.9(6) |
| O(1)-C(2)-C(1)   | 123.8(5) |
| N(1)-C(2)-C(1)   | 117.2(5) |



|                   |           |
|-------------------|-----------|
| O(2)-C(3)-N(1)    | 121.1(5)  |
| O(2)-C(3)-N(2)    | 120.9(5)  |
| N(1)-C(3)-N(2)    | 118.0(5)  |
| O(3)-C(4)-N(2)    | 119.7(4)  |
| O(3)-C(4)-C(1)    | 125.0(5)  |
| N(2)-C(4)-C(1)    | 115.3(4)  |
| C(6B)-C(5)-C(10)  | 116.4(10) |
| C(6B)-C(5)-N(1)   | 129.9(11) |
| C(10)-C(5)-N(1)   | 113.4(6)  |
| C(6B)-C(5)-C(6A)  | 37.9(11)  |
| C(10)-C(5)-C(6A)  | 117.9(8)  |
| N(1)-C(5)-C(6A)   | 110.8(8)  |
| C(6B)-C(5)-H(5)   | 68.2      |
| C(10)-C(5)-H(5)   | 104.4     |
| N(1)-C(5)-H(5)    | 104.4     |
| C(6A)-C(5)-H(5)   | 104.4     |
| C(5)-C(6A)-C(7A)  | 92.4(9)   |
| C(5)-C(6A)-H(6A)  | 113.2     |
| C(7A)-C(6A)-H(6A) | 113.2     |
| C(5)-C(6A)-H(6B)  | 113.2     |
| C(7A)-C(6A)-H(6B) | 113.2     |
| H(6A)-C(6A)-H(6B) | 110.6     |
| C(8)-C(7A)-C(6A)  | 102.7(12) |
| C(8)-C(7A)-H(7A)  | 111.2     |
| C(6A)-C(7A)-H(7A) | 111.2     |
| C(8)-C(7A)-H(7B)  | 111.2     |
| C(6A)-C(7A)-H(7B) | 111.2     |
| H(7A)-C(7A)-H(7B) | 109.1     |
| C(5)-C(6B)-C(7B)  | 133.9(16) |
| C(5)-C(6B)-H(6C)  | 103.7     |
| C(7B)-C(6B)-H(6C) | 103.7     |
| C(5)-C(6B)-H(6D)  | 103.7     |
| C(7B)-C(6B)-H(6D) | 103.7     |
| H(6C)-C(6B)-H(6D) | 105.4     |
| C(6B)-C(7B)-C(8)  | 99.6(13)  |
| C(6B)-C(7B)-H(7C) | 111.8     |
| C(8)-C(7B)-H(7C)  | 111.8     |
| C(6B)-C(7B)-H(7D) | 111.8     |
| C(8)-C(7B)-H(7D)  | 111.8     |
| H(7C)-C(7B)-H(7D) | 109.6     |
| C(7A)-C(8)-C(9)   | 100.5(10) |
| C(7A)-C(8)-C(7B)  | 25.8(9)   |
| C(9)-C(8)-C(7B)   | 117.0(9)  |
| C(7A)-C(8)-H(8A)  | 111.7     |
| C(9)-C(8)-H(8A)   | 111.7     |
| C(7B)-C(8)-H(8A)  | 117.6     |

|                     |          |
|---------------------|----------|
| C(7A)-C(8)-H(8B)    | 111.7    |
| C(9)-C(8)-H(8B)     | 111.7    |
| C(7B)-C(8)-H(8B)    | 86.6     |
| H(8A)-C(8)-H(8B)    | 109.4    |
| C(10)-C(9)-C(8)     | 109.6(9) |
| C(10)-C(9)-H(9A)    | 109.7    |
| C(8)-C(9)-H(9A)     | 109.7    |
| C(10)-C(9)-H(9B)    | 109.7    |
| C(8)-C(9)-H(9B)     | 109.7    |
| H(9A)-C(9)-H(9B)    | 108.2    |
| C(5)-C(10)-C(9)     | 113.8(7) |
| C(5)-C(10)-H(10A)   | 108.8    |
| C(9)-C(10)-H(10A)   | 108.8    |
| C(5)-C(10)-H(10B)   | 108.8    |
| C(9)-C(10)-H(10B)   | 108.8    |
| H(10A)-C(10)-H(10B) | 107.7    |
| N(2)-C(11)-C(16)    | 111.1(4) |
| N(2)-C(11)-C(12)    | 112.4(4) |
| C(16)-C(11)-C(12)   | 113.8(4) |
| N(2)-C(11)-H(11)    | 106.3    |
| C(16)-C(11)-H(11)   | 106.3    |
| C(12)-C(11)-H(11)   | 106.3    |
| C(13)-C(12)-C(11)   | 110.1(4) |
| C(13)-C(12)-H(12A)  | 109.6    |
| C(11)-C(12)-H(12A)  | 109.6    |
| C(13)-C(12)-H(12B)  | 109.6    |
| C(11)-C(12)-H(12B)  | 109.6    |
| H(12A)-C(12)-H(12B) | 108.2    |
| C(12)-C(13)-C(14)   | 111.7(4) |
| C(12)-C(13)-H(13A)  | 109.3    |
| C(14)-C(13)-H(13A)  | 109.3    |
| C(12)-C(13)-H(13B)  | 109.3    |
| C(14)-C(13)-H(13B)  | 109.3    |
| H(13A)-C(13)-H(13B) | 107.9    |
| C(15)-C(14)-C(13)   | 110.7(4) |
| C(15)-C(14)-H(14A)  | 109.5    |
| C(13)-C(14)-H(14A)  | 109.5    |
| C(15)-C(14)-H(14B)  | 109.5    |
| C(13)-C(14)-H(14B)  | 109.5    |
| H(14A)-C(14)-H(14B) | 108.1    |
| C(14)-C(15)-C(16)   | 111.3(5) |
| C(14)-C(15)-H(15A)  | 109.4    |
| C(16)-C(15)-H(15A)  | 109.4    |
| C(14)-C(15)-H(15B)  | 109.4    |
| C(16)-C(15)-H(15B)  | 109.4    |
| H(15A)-C(15)-H(15B) | 108.0    |

|                     |          |
|---------------------|----------|
| C(11)-C(16)-C(15)   | 110.1(4) |
| C(11)-C(16)-H(16A)  | 109.6    |
| C(15)-C(16)-H(16A)  | 109.6    |
| C(11)-C(16)-H(16B)  | 109.6    |
| C(15)-C(16)-H(16B)  | 109.6    |
| H(16A)-C(16)-H(16B) | 108.1    |
| C(1)-C(17)-C(18)    | 132.8(5) |
| C(1)-C(17)-H(17)    | 113.6    |
| C(18)-C(17)-H(17)   | 113.6    |
| C(23)-C(18)-C(19)   | 116.5(5) |
| C(23)-C(18)-C(17)   | 125.4(5) |
| C(19)-C(18)-C(17)   | 117.5(5) |
| O(4)-C(19)-C(20)    | 122.9(5) |
| O(4)-C(19)-C(18)    | 116.0(4) |
| C(20)-C(19)-C(18)   | 121.1(5) |
| C(21)-C(20)-C(19)   | 120.0(5) |
| C(21)-C(20)-H(20)   | 120.0    |
| C(19)-C(20)-H(20)   | 120.0    |
| O(5)-C(21)-C(20)    | 125.7(5) |
| O(5)-C(21)-C(22)    | 114.7(5) |
| C(20)-C(21)-C(22)   | 119.6(5) |
| C(23)-C(22)-C(21)   | 119.7(5) |
| C(23)-C(22)-H(22)   | 120.1    |
| C(21)-C(22)-H(22)   | 120.1    |
| C(22)-C(23)-C(18)   | 123.0(5) |
| C(22)-C(23)-H(23)   | 118.5    |
| C(18)-C(23)-H(23)   | 118.5    |
| O(4)-C(24)-H(24A)   | 109.5    |
| O(4)-C(24)-H(24B)   | 109.5    |
| H(24A)-C(24)-H(24B) | 109.5    |
| O(4)-C(24)-H(24C)   | 109.5    |
| H(24A)-C(24)-H(24C) | 109.5    |
| H(24B)-C(24)-H(24C) | 109.5    |
| O(5)-C(25)-H(25A)   | 109.5    |
| O(5)-C(25)-H(25B)   | 109.5    |
| H(25A)-C(25)-H(25B) | 109.5    |
| O(5)-C(25)-H(25C)   | 109.5    |
| H(25A)-C(25)-H(25C) | 109.5    |
| H(25B)-C(25)-H(25C) | 109.5    |

---

Symmetry transformations used to generate equivalent atoms:

**Table 10.** Anisotropic displacement parameters ( $\text{\AA}^2 \times 10^3$ ) for **43**.

The anisotropic displacement factor exponent takes the form:  
 $-2 \pi^2 [ h^2 a^*{}^2 U_{11} + \dots + 2 h k a^* b^* U_{12} ]$

|       | U11    | U22   | U33     | U23    | U13    | U12    |
|-------|--------|-------|---------|--------|--------|--------|
| O(1)  | 72(3)  | 41(3) | 86(4)   | -17(2) | -39(3) | 17(2)  |
| O(2)  | 34(2)  | 41(2) | 58(2)   | 6(2)   | -12(2) | -7(2)  |
| O(3)  | 27(2)  | 36(2) | 35(2)   | 1(1)   | -3(1)  | -3(1)  |
| O(4)  | 26(2)  | 41(2) | 28(2)   | 3(1)   | -4(1)  | -5(1)  |
| O(5)  | 41(2)  | 43(2) | 40(2)   | 9(2)   | -11(2) | -4(2)  |
| N(1)  | 37(2)  | 39(3) | 39(2)   | 5(2)   | -7(2)  | -3(2)  |
| N(2)  | 22(2)  | 37(2) | 26(2)   | 4(2)   | -6(2)  | -1(2)  |
| C(1)  | 22(2)  | 48(3) | 26(2)   | 1(2)   | -3(2)  | 0(2)   |
| C(2)  | 38(3)  | 43(3) | 33(3)   | 1(2)   | -13(2) | 9(2)   |
| C(3)  | 28(3)  | 48(3) | 28(2)   | 2(2)   | -5(2)  | 1(2)   |
| C(4)  | 21(2)  | 40(3) | 23(2)   | 1(2)   | 1(2)   | 4(2)   |
| C(5)  | 50(4)  | 52(4) | 63(4)   | 13(3)  | -10(3) | -12(3) |
| C(6A) | 77(6)  | 45(3) | 55(5)   | 13(4)  | 31(4)  | 7(4)   |
| C(7A) | 77(6)  | 45(3) | 55(5)   | 13(4)  | 31(4)  | 7(4)   |
| C(6B) | 77(6)  | 45(3) | 55(5)   | 13(4)  | 31(4)  | 7(4)   |
| C(7B) | 77(6)  | 45(3) | 55(5)   | 13(4)  | 31(4)  | 7(4)   |
| C(8)  | 111(8) | 54(5) | 143(11) | 20(6)  | 53(8)  | 0(5)   |
| C(9)  | 84(6)  | 48(4) | 94(6)   | 0(4)   | 7(5)   | -25(4) |
| C(10) | 136(9) | 50(5) | 84(6)   | -17(4) | 58(6)  | -37(5) |
| C(11) | 24(2)  | 37(3) | 24(2)   | 1(2)   | 1(2)   | 4(2)   |
| C(12) | 28(3)  | 44(3) | 25(2)   | 3(2)   | 4(2)   | 3(2)   |
| C(13) | 35(3)  | 48(3) | 32(3)   | -3(2)  | 5(2)   | 9(2)   |
| C(14) | 39(3)  | 36(3) | 34(3)   | 2(2)   | -5(2)  | 6(2)   |
| C(15) | 55(4)  | 44(3) | 27(2)   | 5(2)   | 8(2)   | 9(3)   |
| C(16) | 43(3)  | 38(3) | 29(2)   | -2(2)  | 4(2)   | 7(2)   |
| C(17) | 20(2)  | 41(3) | 35(3)   | 0(2)   | 1(2)   | 3(2)   |
| C(18) | 24(2)  | 35(3) | 30(2)   | -5(2)  | -1(2)  | 0(2)   |
| C(19) | 26(2)  | 39(3) | 26(2)   | 1(2)   | 2(2)   | 3(2)   |
| C(20) | 22(2)  | 38(3) | 33(3)   | -2(2)  | 1(2)   | -2(2)  |
| C(21) | 28(3)  | 44(3) | 31(2)   | -1(2)  | -2(2)  | 1(2)   |
| C(22) | 37(3)  | 36(3) | 40(3)   | 4(2)   | 4(2)   | -11(2) |
| C(23) | 28(3)  | 47(3) | 38(3)   | -3(2)  | 0(2)   | -9(2)  |
| C(24) | 31(3)  | 45(3) | 29(2)   | -2(2)  | 3(2)   | -8(2)  |
| C(25) | 36(3)  | 44(3) | 40(3)   | 4(2)   | -10(2) | -2(2)  |

**Table 11.** Hydrogen coordinates (  $\times 10^4$ ) and isotropic displacement parameters ( $\text{\AA}^2 \times 10^3$ ) for **43**.

|        | x     | y    | z     | U(eq) |
|--------|-------|------|-------|-------|
| H(5)   | 2885  | 3169 | 3428  | 69    |
| H(6A)  | 3720  | 3150 | 5863  | 68    |
| H(6B)  | 5834  | 2892 | 5803  | 68    |
| H(7A)  | 1766  | 2509 | 5320  | 68    |
| H(7B)  | 1354  | 2698 | 3845  | 68    |
| H(6C)  | 1753  | 2999 | 3893  | 68    |
| H(6D)  | 3114  | 3178 | 5216  | 68    |
| H(7C)  | 1673  | 2579 | 5444  | 68    |
| H(7D)  | 4238  | 2638 | 6163  | 68    |
| H(8A)  | 3312  | 2113 | 4095  | 118   |
| H(8B)  | 5421  | 2353 | 4788  | 118   |
| H(9A)  | 4935  | 2353 | 2237  | 92    |
| H(9B)  | 2600  | 2551 | 2171  | 92    |
| H(10A) | 6892  | 2843 | 3234  | 102   |
| H(10B) | 5106  | 3004 | 2010  | 102   |
| H(11)  | 4950  | 4612 | 2580  | 35    |
| H(12A) | 827   | 4281 | 2744  | 39    |
| H(12B) | 2111  | 4569 | 3800  | 39    |
| H(13A) | 1610  | 5016 | 2130  | 46    |
| H(13B) | -761  | 4848 | 2197  | 46    |
| H(14A) | -658  | 4493 | 254   | 46    |
| H(14B) | -356  | 4908 | -99   | 46    |
| H(15A) | 3490  | 4832 | 163   | 50    |
| H(15B) | 2270  | 4546 | -925  | 50    |
| H(16A) | 2879  | 4080 | 707   | 44    |
| H(16B) | 5217  | 4268 | 689   | 44    |
| H(17)  | 10680 | 4255 | 5717  | 39    |
| H(20)  | 16892 | 3946 | 8642  | 38    |
| H(22)  | 12420 | 3173 | 9086  | 46    |
| H(23)  | 9950  | 3412 | 7323  | 46    |
| H(24A) | 16000 | 4576 | 8134  | 53    |
| H(24B) | 16149 | 4732 | 6669  | 53    |
| H(24C) | 17583 | 4387 | 7252  | 53    |
| H(25A) | 19258 | 3543 | 10020 | 63    |
| H(25B) | 19032 | 3410 | 11503 | 63    |
| H(25C) | 18082 | 3795 | 10963 | 63    |

**Table 12.** Torsion angles [deg] for **43**.

---

|                        |           |
|------------------------|-----------|
| C(3)-N(1)-C(2)-O(1)    | -163.9(6) |
| C(5)-N(1)-C(2)-O(1)    | 13.9(9)   |
| C(3)-N(1)-C(2)-C(1)    | 13.7(8)   |
| C(5)-N(1)-C(2)-C(1)    | -168.4(6) |
| C(17)-C(1)-C(2)-O(1)   | -10.3(10) |
| C(4)-C(1)-C(2)-O(1)    | 164.4(6)  |
| C(17)-C(1)-C(2)-N(1)   | 172.1(5)  |
| C(4)-C(1)-C(2)-N(1)    | -13.1(7)  |
| C(2)-N(1)-C(3)-O(2)    | 177.6(5)  |
| C(5)-N(1)-C(3)-O(2)    | -0.3(8)   |
| C(2)-N(1)-C(3)-N(2)    | -2.6(8)   |
| C(5)-N(1)-C(3)-N(2)    | 179.5(5)  |
| C(4)-N(2)-C(3)-O(2)    | 169.8(5)  |
| C(11)-N(2)-C(3)-O(2)   | -4.4(7)   |
| C(4)-N(2)-C(3)-N(1)    | -10.0(7)  |
| C(11)-N(2)-C(3)-N(1)   | 175.8(4)  |
| C(3)-N(2)-C(4)-O(3)    | -168.7(5) |
| C(11)-N(2)-C(4)-O(3)   | 5.6(6)    |
| C(3)-N(2)-C(4)-C(1)    | 9.9(6)    |
| C(11)-N(2)-C(4)-C(1)   | -175.8(4) |
| C(17)-C(1)-C(4)-O(3)   | -4.1(7)   |
| C(2)-C(1)-C(4)-O(3)    | -179.4(5) |
| C(17)-C(1)-C(4)-N(2)   | 177.4(4)  |
| C(2)-C(1)-C(4)-N(2)    | 2.1(7)    |
| C(3)-N(1)-C(5)-C(6B)   | -86.8(16) |
| C(2)-N(1)-C(5)-C(6B)   | 95.3(16)  |
| C(3)-N(1)-C(5)-C(10)   | 99.6(8)   |
| C(2)-N(1)-C(5)-C(10)   | -78.4(9)  |
| C(3)-N(1)-C(5)-C(6A)   | -125.2(8) |
| C(2)-N(1)-C(5)-C(6A)   | 56.9(9)   |
| C(6B)-C(5)-C(6A)-C(7A) | 38.3(14)  |
| C(10)-C(5)-C(6A)-C(7A) | -59.6(11) |
| N(1)-C(5)-C(6A)-C(7A)  | 167.4(7)  |
| C(5)-C(6A)-C(7A)-C(8)  | 78.1(11)  |
| C(10)-C(5)-C(6B)-C(7B) | 43(3)     |
| N(1)-C(5)-C(6B)-C(7B)  | -130(2)   |
| C(6A)-C(5)-C(6B)-C(7B) | -59(3)    |
| C(5)-C(6B)-C(7B)-C(8)  | -42(3)    |
| C(6A)-C(7A)-C(8)-C(9)  | -82.8(12) |
| C(6A)-C(7A)-C(8)-C(7B) | 50(2)     |
| C(6B)-C(7B)-C(8)-C(7A) | -63(2)    |
| C(6B)-C(7B)-C(8)-C(9)  | -8(2)     |
| C(7A)-C(8)-C(9)-C(10)  | 66.2(14)  |

|                         |           |
|-------------------------|-----------|
| C(7B)-C(8)-C(9)-C(10)   | 45.1(17)  |
| C(6B)-C(5)-C(10)-C(9)   | 10.0(17)  |
| N(1)-C(5)-C(10)-C(9)    | -175.4(8) |
| C(6A)-C(5)-C(10)-C(9)   | 52.8(14)  |
| C(8)-C(9)-C(10)-C(5)    | -47.1(13) |
| C(3)-N(2)-C(11)-C(16)   | -61.9(6)  |
| C(4)-N(2)-C(11)-C(16)   | 123.5(5)  |
| C(3)-N(2)-C(11)-C(12)   | 66.9(6)   |
| C(4)-N(2)-C(11)-C(12)   | -107.7(5) |
| N(2)-C(11)-C(12)-C(13)  | 178.6(4)  |
| C(16)-C(11)-C(12)-C(13) | -54.0(6)  |
| C(11)-C(12)-C(13)-C(14) | 55.2(6)   |
| C(12)-C(13)-C(14)-C(15) | -57.8(7)  |
| C(13)-C(14)-C(15)-C(16) | 56.9(7)   |
| N(2)-C(11)-C(16)-C(15)  | -178.6(5) |
| C(12)-C(11)-C(16)-C(15) | 53.4(6)   |
| C(14)-C(15)-C(16)-C(11) | -54.3(7)  |
| C(2)-C(1)-C(17)-C(18)   | -13.4(9)  |
| C(4)-C(1)-C(17)-C(18)   | 171.7(5)  |
| C(1)-C(17)-C(18)-C(23)  | -25.3(9)  |
| C(1)-C(17)-C(18)-C(19)  | 163.7(5)  |
| C(24)-O(4)-C(19)-C(20)  | -17.4(7)  |
| C(24)-O(4)-C(19)-C(18)  | 162.8(4)  |
| C(23)-C(18)-C(19)-O(4)  | -178.4(4) |
| C(17)-C(18)-C(19)-O(4)  | -6.5(7)   |
| C(23)-C(18)-C(19)-C(20) | 1.9(7)    |
| C(17)-C(18)-C(19)-C(20) | 173.7(5)  |
| O(4)-C(19)-C(20)-C(21)  | 178.6(5)  |
| C(18)-C(19)-C(20)-C(21) | -1.6(8)   |
| C(25)-O(5)-C(21)-C(20)  | 3.0(8)    |
| C(25)-O(5)-C(21)-C(22)  | -175.5(5) |
| C(19)-C(20)-C(21)-O(5)  | -177.4(5) |
| C(19)-C(20)-C(21)-C(22) | 1.0(8)    |
| O(5)-C(21)-C(22)-C(23)  | 177.9(5)  |
| C(20)-C(21)-C(22)-C(23) | -0.6(9)   |
| C(21)-C(22)-C(23)-C(18) | 1.0(9)    |
| C(19)-C(18)-C(23)-C(22) | -1.6(8)   |
| C(17)-C(18)-C(23)-C(22) | -172.7(5) |

---

### 3. In vitro pharmacokinetic studies of 7

All of these studies were performed at Apredica, Inc. in Watertown, MA

#### 3.1. Chromatography and mass spectrometry

Samples were analyzed by LC-MS/MS using an Agilent 6410 mass spectrometer coupled with an Agilent 1200 HPLC and a CTC PAL chilled auto sampler, all controlled by MassHunter software (Agilent). After separation on a C18 reverse phase HPLC column (Agilent, Waters, or equivalent) using a 4 min acetonitrile-water gradient system, peaks were analyzed by mass spectrometry (MS) using ESI ionization in the MRM mode. The mass spectrometer gas flows and voltages were individually tuned to provide optimal signal for each compound. Trial spectra were obtained to determine the best conditions for data collection. The transition(s) that gave the best signal/noise ratio were used for data analysis.

#### 3.2. Microsomal stability

Test compounds were incubated in duplicate at 5  $\mu$ M concentration with human or mouse microsomes at 37 °C. The reaction mixture contained 0.275 mg/mL microsomal protein in 100 mM potassium phosphate, 2 mM NADPH, 3 mM MgCl<sub>2</sub>, pH 7.4. A control was run for each test agent omitting NADPH to detect NADPH-independent degradation. After 15 sec, 10 min, 20 min, 40 min, and 60 min incubation, aliquots were removed from each experimental and control reaction and mixed with an equal volume of ice-cold Stop Solution (0.3% acetic acid in acetonitrile containing 0.3  $\mu$ M haloperidol as an internal standard). Stopped reactions were incubated at least 10 min at -20 °C, and an additional volume of water was added. The samples were centrifuged to remove precipitated protein, and the supernatants were analyzed by LC-MS/MS to quantify the remaining parent. Excel was used for the calculations. The Response Ratio (RR) was calculated by the Mass Hunter software by dividing the peak area of the analyte by the peak area of the internal standard. The relative ratio was calculated by dividing the RR with NADPH by the RR from the -NADPH control at the same time point.

$$(Relative\ Ratio = PA_{+NADPH} / PA_{-NADPH})$$

The % remaining (RE) compound was calculated by dividing the relative ratio of the sample in question by A0,

$$RE = RR / A0$$

where A0 is a correction factor for small differences in the starting concentration, extraction efficiency, etc. Curve fitting was used to determine A0, k (first-order rate constant) using an exponential fit with 1/Y weighing. The half-life was calculated as:  $T_{1/2} = \ln(2) / k$ . The intrinsic clearance was calculated as follows:  $CL'_{int} = (0.693/T_{1/2}) \times (\text{mL incubation/mg microsomal protein}) \times (\text{mg microsomal protein/g liver}) \times (\text{g liver/kg bodyweight})$ .<sup>5</sup> The scale-up factor for microsomes protein to g of liver is 45 mg/g of liver.<sup>6</sup> Liver weights used for human and mice were 20 g/kg body weight and 34 g/kg body weight, respectively.<sup>7,8</sup> The units on the  $CL_{int}$  are mL/min/kg.

#### 3.3. Caco-2 monolayer permeability

Caco-2 permeability is measured by detecting the amount of compound that permeates through a confluent monolayer of Caco-2 cells. Caco-2 cells grown in tissue culture flasks were trypsinized, suspended in medium, and the suspensions were applied to wells of a collagen-coated BioCoat Cell Environment in a 24-well format (BD Biosciences). The cells were allowed to grow and differentiate for three weeks, feeding at 2-day intervals.

Stock solutions of 10 mM test compound or control prepared in DMSO were used to prepare solutions for the Caco-2 permeability studies. For apical to basolateral (A  $\rightarrow$  B), the apical (A-side) buffer contained 50  $\mu$ M test compound or control and 100  $\mu$ M Lucifer yellow dye in the



transport buffer (1.98 g/L glucose in 10 mM HEPES, 1 × Hank’s Balanced Salt Solution) at pH 6.5; the basolateral (B-side) buffer was the transport buffer at pH 7.4. For B → A studies, the A-side buffer contained 100 μM Lucifer yellow in the transport buffer, pH 6.5, and the B-side buffer contained 50 μM test compound or control in the transport buffer, pH 7.4. The Caco-2 cells were incubated with these buffers for 2 h, and the cell buffers and dosing solutions were removed for analysis.

To verify that the Caco-2 cell monolayer was properly formed, an aliquot of the cell buffer from each well was analyzed by fluorescence to determine the transport of the impermeable dye Lucifer Yellow. In all cases, acceptable transport of Lucifer Yellow was observed (< 1% transport in 2 h).

Caco-2 results are reported as apparent permeability,  $P_{app}$ , expressed in units of  $10^{-6}$  cm/sec:

$$P_{app} = \frac{dQ/dt}{c_0 A},$$

where  $dQ/dt$  is the rate of permeation (mol test compound transported per unit time),  $c_0$  is the initial concentration of test compound, and  $A$  is the area of the cell monolayer

### 3.4. Solubility screen

The solubility of the test compounds in PBS was estimated by absorbance. Three-fold serial dilutions were prepared in DMSO at 100 times the final concentration. This DMSO stock was diluted to the final concentration in PBS, the plate was incubated at room temperature for 1 h, then it was examined visually for the formation of precipitate, and the absorbance at 450 nm was measured. For non-colored compounds, the absorbance value was used to detect solubility, while for highly colored compounds, visual inspection was used. The highest concentration that was not visibly cloudy and whose absorbance was not different from background was judged to be the solubility limit.

### 3.5. Plasma and PBS stability

The test compounds, with warfarin and diltiazem as controls, were incubated in mouse plasma and phosphate buffered saline in duplicate at 5 μM. The time-zero samples were taken immediately (15 sec) after adding the compounds. The plate containing the plasma and PBS samples was incubated at 37 °C, and then time points were taken at 10, 20, 40, 60 min in the same way. The plasma samples and PBS samples were precipitated with acetonitrile containing haloperidol as an internal standard and either centrifuged or filtered through a Varian Captiva plate (following the manufacturer’s directions) to remove precipitated protein. The samples were then analyzed on LC-MS/MS.

The response ratio (RR = area of analyte peak divided by the area of the internal standard peak), as calculated by the LC-MS software, was used for determining the plasma stability. The relative ratio was calculated by dividing the RR from plasma by the RR from the PBS control at the same time point.

$$(Relative\ Ratio = RR_{plasma} / RR_{PBS})$$

The % remaining (RE) compound was calculated by dividing the relative ratio of the sample in question by  $A_0$ ,

$$RE = RR / A_0$$

where  $A_0$  is a correction factor for small differences in starting concentration, extraction efficiency, etc. Curve fitting was used to determine  $A_0$ ,  $k$  (first-order rate constant) using an exponential fit with 1/Y weighting. The half-life was calculated as:  $T_{1/2} = \ln(2) / k$ .

To determine PBS half-life, the RR was fit to a first-order exponential curve to determine  $A_{PBS}$  and  $k_{PBS}$ :  $RR = A_{PBS} e^{-k_{PBS}t}$ . The half-life was calculated as above:  $T_{1/2} = \ln(2) / k_{PBS}$ .

**4. Radioligand Binding Assays.** Radioligand binding assays for **7** (10  $\mu$ M) were carried out by MDS Pharma Services (Taipei, Taiwan)

Table 13. Competitive binding assays of **7** (10  $\mu$ M)

| <b>Target</b>                          | <b>Inhibition (%)</b> | <b>Target</b>                                         | <b>Inhibition (%)</b> |
|----------------------------------------|-----------------------|-------------------------------------------------------|-----------------------|
| Adenosine A <sub>1</sub>               | 15                    | Glutamate, NMDA, Phencyclidine                        | -3                    |
| Adenosine A <sub>2A</sub>              | -14                   | Histamine H <sub>1</sub>                              | -20                   |
| Adenosine A <sub>3</sub>               | 0                     | Histamine H <sub>2</sub>                              | 4                     |
| Adrenergic $\alpha_{1A}$               | -9                    | Histamine H <sub>3</sub>                              | -1                    |
| Adrenergic $\alpha_{1B}$               | -1                    | Imidazoline I <sub>2</sub> , Central                  | 0                     |
| Adrenergic $\alpha_{1D}$               | -13                   | Interleukin IL-1                                      | 1                     |
| Adrenergic $\alpha_{2A}$               | -2                    | Leukotriene, Cysteinyl CysLT <sub>1</sub>             | 17                    |
| Adrenergic $\beta_1$                   | 11                    | Melatonin MT <sub>1</sub>                             | 5                     |
| Adrenergic $\beta_2$                   | -3                    | Muscarinic M <sub>1</sub>                             | 1                     |
| Androgen (Testosterone) AR             | 4                     | Muscarinic M <sub>2</sub>                             | -1                    |
| Bradykinin B <sub>1</sub>              | 3                     | Muscarinic M <sub>3</sub>                             | 7                     |
| Bradykinin B <sub>2</sub>              | 4                     | Neuropeptide Y Y <sub>1</sub>                         | 11                    |
| Calcium Channel L-Type, Benzothiazepin | 11                    | Neuropeptide Y Y <sub>2</sub>                         | 1                     |
| Calcium Channel L-Type, Dihydropyridin | 0                     | Nicotinic Acetylcholine                               | 0                     |
| Calcium Channel N-Typ                  | -3                    | Nicotinic Acetylcholine D <sub>1</sub> , Bungarotoxin | 2                     |
| Dopamine D <sub>1</sub>                | -11                   | Opiate $\delta$ (OP1, DOP)                            | -7                    |
| Dopamine D <sub>25</sub>               | 6                     | Opiate $\kappa$ (OP2, KOP)                            | 0                     |
| Dopamine D <sub>3</sub>                | 41                    | Opiate $\mu$ (OP3, MOP)                               | -5                    |

|                                      |    |                                                     |    |
|--------------------------------------|----|-----------------------------------------------------|----|
| Dopamine D <sub>4.2</sub>            | -7 | Phorbol Ester                                       | -5 |
| Endothelin ET <sub>A</sub>           | 15 | Platelet Activating Factor (PAF)                    | -1 |
| Endothelin ET <sub>B</sub>           | -7 | Potassium Channel [KATP]                            | -5 |
| Epidermal Growth Factor (EGF)        | -8 | Potassium Channel hERG                              | -2 |
| Estrogen ER $\alpha$                 | 20 | Prostanoid EP <sub>4</sub>                          | -8 |
| G Protein-Coupled Receptor<br>GPR103 | -9 | Purinergic P <sub>2x</sub>                          | 3  |
| GABAA, Flunitrazepam, Central        | 5  | Purinergic P <sub>2y</sub>                          | 8  |
| GABAA, Muscimol, Central             | -2 | Rolipram                                            | 9  |
| GABAB <sub>1A</sub>                  | -7 | Serotonin (5-Hydroxytryptamine) 5-HT <sub>1A</sub>  | 16 |
| Glucocorticoid                       | -2 | Serotonin (5-Hydroxytryptamine) 5-HT <sub>3</sub>   | 1  |
| Glutamate, Kainate                   | 14 | Sigma $\delta_1$                                    | -4 |
| Glutamate, NMDA, Agonism             | 17 | Sigma $\delta_2$                                    | 4  |
| Glutamate, NMDA, Glycine             | 7  | Sodium Channel, Site 2                              | 21 |
| Tachykinin NK $\square$              | -2 | Thyroid Hormone                                     | 12 |
| Transporter, Dopamine (DAT)          | 1  | Transporter, GABA                                   | 19 |
| Transporter, Norepinephrine (NET)    | -8 | Transporter, Serotonin (5-Hydroxytryptamine) (SERT) | -4 |

**G85R-SOD1 High Content Aggregation Assay.** Reduction in SOD1 aggregates in cells treated with 7

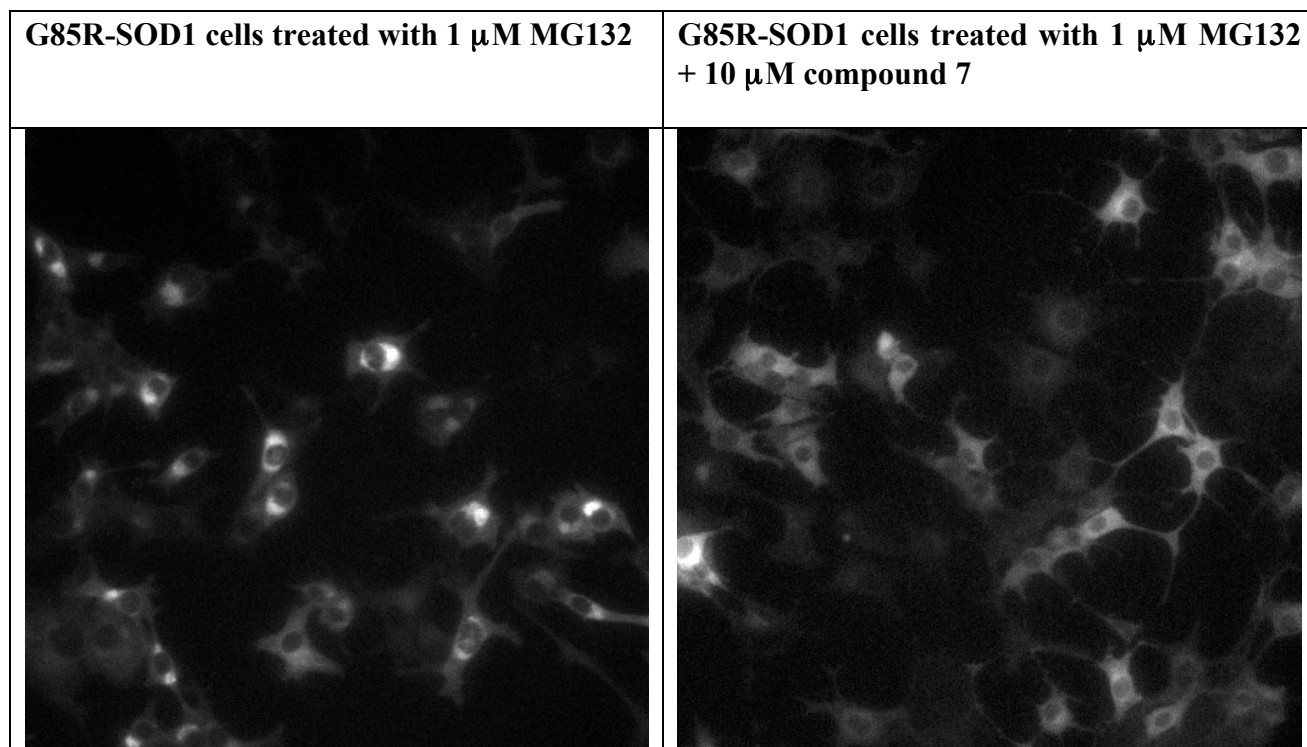

## References

- (1) Cromer, D. T. & Waber, J. T.; *International Tables for X-ray Crystallography* Vol. IV, The Kynoch Press, Birmingham, England, Table 2.2 A **1974**.
- (2) Ibers, J. A. & Hamilton, W. C.; *Acta Crystallogr*, **1974**, *17*, 781.
- (3) Creagh, D. C. & McAuley, W.J. ; *International Tables for Crystallography*, Vol C, Table 4.2.6.8, **1992**, 219-222.
- (4) Creagh, D. C. & Hubbell, J.H.; *International Tables for Crystallography*, Vol C, Table 4.2.4.3, **1992**, 200-206.
- (5) Obach, R. S. *Drug Metab. Dispos.*, **1999**, *27*, 1360-1359.
- (6) Houston, J. B. *Biochem. Pharmacol.*, **1994**, *47*, 1469-1479.
- (7) Obach, R. S.; Baxter, J. G.; Liston, T. E.; Silber, B. M.; Jones, B. C.; MacIntyre, R.; Rance, D. J.; Wastall, P. *J. Pharmacol. Exp. Ther.*, **1997**, *283*, 46-58.
- (8) Brown, R. P.; Delp, M. D.; Lindstedt, S. L.; Rhomberg, L. R.; Belilesi, R. P. *Toxicology and Industrial Health*, **1997**, *13*, 407-484.
